# Supplementary material for: 3rd generation MICA with the “K-wires-first technique” - a step-by-step instruction and preliminary results
Source: PubMed Central journal article supplement (PMC8767719; doi:10.1186/s12891-021-04972-5), 2022-01-18
Supplement: 12891_2021_4972_MOESM3_ESM.pdf [file 12891_2021_4972_MOESM3_ESM.pdf]

| Patient 1-50 | Age range | Localisation | Sex | IMA preop | IMA 6 weeks postop | HVA preop | HVA 6 weeks postop |
|--------------|-----------|--------------|-----|-----------|--------------------|-----------|--------------------|
| 1            | 65-75     | right        | f   | 16,1      | 5,5                | 30,1      | 8,7                |
| 2            | 45-55     | left         | f   | 17,4      | 5,6                | 29,3      | 6,9                |
| 3            | 55-65     | right        | f   | 21,4      | 7,1                | 40,6      | 4,6                |
| 4            | 75-85     | left         | f   | 17,6      | 4,9                | 34,7      | 7,1                |
| 5            | 35-45     | right        | f   | 21,4      | 6,1                | 32,3      | 4,4                |
| 6            | 55-65     | left         | f   | 19,1      | 8,8                | 29,2      | 4,5                |
| 7            | 55-65     | left         | f   | 15        | 5,4                | 30        | 4,4                |
| 8            | 55-65     | right        | m   | 15,7      | 7,4                | 28,8      | 9,6                |
| 9            | 55-65     | left         | f   | 12,5      | 4,3                | 39,2      | 10,2               |
| 10           | 35-45     | left         | f   | 16        | 8,2                | 21,8      | 7,4                |
| 11           | 55-65     | right        | f   | 14,5      | 4,8                | 30        | 11,8               |
| 12           | 65-75     | right        | f   | 15,3      | 2,9                | 30,8      | 8,6                |
| 13           | 55-65     | left         | f   | 9,7       | 7,3                | 31        | 14,2               |
| 14           | 75-85     | right        | m   | 14,1      | 3,1                | 26,1      | 6,1                |
| 15           | 65-75     | right        | f   | 19,2      | 6,9                | 37,6      | 16,3               |
| 16           | 65-75     | left         | f   | 18,9      | 6,8                | 42,1      | 8,9                |
| 17           | 35-45     | left         | f   | 19,7      | 5                  | 31,4      | 13,5               |
| 18           | 55-65     | right        | f   | 13,9      | 4,9                | 23,6      | 13,3               |
| 19           | 55-65     | left         | f   | 17,6      | 2,8                | 36,1      | 6,7                |
| 20           | 35-45     | right        | f   | 14,8      | 8,3                | 24,2      | 8,6                |
| 21           | 55-65     | left         | f   | 17,5      | 8,2                | 23,5      | 9,6                |
| 22           | 25-35     | left         | f   | 15,8      | 5,7                | 24        | 3,3                |
| 23           | 65-75     | left         | f   | 12        | 4                  | 25,3      | 11,7               |
| 24           | 45-55     | right        | f   | 14        | 3,9                | 30        | 8                  |
| 25           | 65-75     | right        | f   | 21,5      | 4,8                | 40,8      | 7,3                |
| 26           | 65-75     | right        | m   | 16,2      | 5,6                | 29,7      | 7,9                |
| 27           | 55-65     | right        | f   | 18,1      | 8,2                | 34,8      | 4,8                |
| 28           | 55-65     | right        | f   | 13,8      | 3,7                | 29,3      | 9,8                |
| 29           | 55-65     | left         | f   | 15,5      | 7,9                | 35,6      | 14,3               |
| 30           | 65-75     | right        | m   | 15,3      | 6,1                | 25,4      | 5,3                |
| 31           | 55-65     | left         | f   | 14,4      | 2,8                | 24,4      | 3                  |
| 32           | 18-25     | left         | f   | 14,5      | 3,6                | 29,3      | 7,8                |
| 33           | 65-75     | right        | f   | 20,5      | 5,4                | 34,8      | 2,6                |
| 34           | 18-25     | right        | f   | 13,9      | 4,6                | 25,7      | 6,7                |
| 35           | 55-65     | left         | m   | 13,5      | 1,5                | 28,6      | 12,9               |
| 36           | 75-85     | right        | f   | 18,8      | 7,7                | 35,9      | 9,4                |
| 37           | 35-45     | right        | f   | 17,5      | 5,7                | 25,9      | 4,7                |
| 38           | 55-65     | left         | f   | 15,6      | 7,5                | 23,7      | 4,2                |
| 39           | 45-55     | left         | f   | 18,5      | 2,3                | 30,7      | 11,1               |
| 40           | 45-55     | left         | m   | 17        | 8,5                | 35,2      | 11,3               |
| 41           | 45-55     | right        | f   | 18,1      | 2,2                | 37,5      | 1,5                |
| 42           | 55-65     | right        | f   | 18,2      | 2,5                | 40,7      | 15,7               |
| 43           | 55-65     | left         | f   | 19        | 6,1                | 34        | 10,9               |
| 44           | 25-35     | right        | f   | 14,5      | 3                  | 22,8      | 2,7                |
| 45           | 55-65     | left         | m   | 10,5      | 2,8                | 32,2      | 12,6               |
| 46           | 45-55     | right        | f   | 14,4      | 5,6                | 23,6      | 6,4                |
| 47           | 45-55     | left         | f   | 14,8      | 5,2                | 25,4      | 8,1                |
| 48           | 55-65     | left         | f   | 17,4      | 8,4                | 34,2      | 15                 |
| 49           | 45-55     | right        | f   | 17,9      | 5,3                | 35        | 12,9               |
| 50           | 45-55     | right        | f   | 13,8      | 4,3                | 23,7      | 5,4                |
